# Supplementary material
Source: Research Square preprint supplement (doi:10.21203/rs.3.rs-9283676/v1)
Supplement: Supplementary file 1 [file GIS-Attribute Table.pdf › GIS-Attribute Table.pdf]

| Name_ States           | Adj. GHI | WSI_Norm | SWSI-base | Grid_CO2_Norm | HPI      | TPI       | Tech_class  | DataStatus      | Cluster Number |
|------------------------|----------|----------|-----------|---------------|----------|-----------|-------------|-----------------|----------------|
| Andaman and Nicobar    | No data  | 3.10E-05 | No data   | 0.762043      | 2.40E-05 | No data   | Avoid hydr  | Data-incomplete | cluster2       |
| Andhra Pradesh         | 0.2195   | 0.614927 | 0.084517  | 0.793621      | 0.48802  | -0.403502 | Avoid hydr  | Complete        | cluster1       |
| Arunachal Pradesh      | No data  | 0.00544  | No data   | 2.50E-05      | 0        | No data   | Avoid hydr  | Data-incomplete | cluster2       |
| Assam                  | 0.2299   | 0.090309 | 0.20914   | 0.707756      | 0.06392  | 0.145223  | Grid hydro  | Complete        | cluster2       |
| Bihar                  | 0.0439   | 0.342846 | 0.028846  | 0.995345      | 0.34125  | -0.312404 | Avoid hydr  | Complete        | cluster1       |
| Chandigarh             | 0.2114   | 1        | -4.22E-12 | 0.030698      | 0.0307   | -0.030698 | Avoid hydr  | Complete        | cluster2       |
| Chhattisgarh           | 0.1674   | 0.327981 | 0.1125    | 0.983859      | 0.32269  | -0.210188 | Avoid hydr  | Complete        | cluster1       |
| Dadra and Nagar Haveli | 0.7424   | 0.36388  | 0.472255  | 0.132113      | 0.04807  | 0.424182  | Solar prio  | Complete        | cluster0       |
| Daman and Diu          | No data  | 0.76163  | No data   | 0.132113      | 0.10062  | No data   | Avoid hydr  | Data-incomplete | cluster2       |
| Goa                    | 0.4519   | 0.155051 | 0.381839  | 0.028622      | 0.00444  | 0.377401  | Condit iona | Complete        | cluster0       |
| Gujarat                | 0.4601   | 0.763768 | 0.108679  | 0.588954      | 0.44982  | -0.341145 | Avoid hydr  | Complete        | cluster1       |
| Haryana                | 0.1383   | 0.862903 | 0.018967  | 0.938403      | 0.80975  | -0.790784 | Avoid hydr  | Complete        | cluster1       |
| Himachal Pradesh       | 0.0334   | 0.450281 | 0.018343  | 7.50E-05      | 3.40E-05 | 0.018309  | Grid hydro  | Complete        | cluster2       |
| Jammu and Kashmir      | 0        | 0.38507  | 0         | 1.30E-05      | 5.00E-06 | -5.00E-06 | Avoid hydr  | Complete        | cluster2       |

|                |         |          |          |          |          |           |             |                 |          |
|----------------|---------|----------|----------|----------|----------|-----------|-------------|-----------------|----------|
| Jharkhand      | 0.1031  | 0.263011 | 0.076004 | 0.99464  | 0.2616   | -0.185597 | Avoid hydr  | Complete        | cluster1 |
| Karnataka      | 0.4527  | 0.51728  | 0.218535 | 0.466025 | 0.24107  | -0.02253  | Avoid hydr  | Complete        | cluster2 |
| Kerala         | 0.7363  | 0.381414 | 0.455474 | 0.006202 | 0.00237  | 0.453108  | Solar prio  | Complete        | cluster0 |
| Lakshadweep    | No data | No data  | No data  | 1        | No data  | No data   | Avoid hydr  | Data-incomplete | cluster2 |
| Madhya Pradesh | 0.1455  | 0.604233 | 0.057597 | 0.888117 | 0.53663  | -0.479033 | Avoid hydr  | Complete        | cluster1 |
| Maharashtra    | 0.3659  | 0.496767 | 0.184119 | 0.798868 | 0.39685  | -0.212732 | Avoid hydr  | Complete        | cluster1 |
| Manipur        | 0.3512  | 0.104867 | 0.314409 | 0.000415 | 4.40E-05 | 0.314365  | Condit iona | Complete        | cluster0 |
| Meghalaya      | 0.3111  | 0.162071 | 0.26067  | 1.30E-05 | 2.00E-06 | 0.260668  | Condit iona | Complete        | cluster0 |
| Mizoram        | 0.3568  | 0.08391  | 0.326836 | 0.001547 | 0.00013  | 0.326706  | Condit iona | Complete        | cluster0 |
| Nagaland       | 0.4563  | 0.099442 | 0.410893 | 0        | 0        | 0.410893  | Solar prio  | Complete        | cluster0 |
| NCT of Delhi   | 0.1665  | 0.927052 | 0.012148 | 0.499528 | 0.46309  | -0.45094  | Avoid hydr  | Complete        | cluster1 |
| Odisha         | 0.2524  | 0.349561 | 0.164192 | 0.900447 | 0.31476  | -0.150569 | Avoid hydr  | Complete        | cluster1 |
| Puducherry     | 0.3345  | 0.447021 | 0.184974 | 0.554922 | 0.24806  | -0.063088 | Avoid hydr  | Complete        | cluster2 |
| Punjab         | 0.1004  | 0.713881 | 0.028727 | 0.83178  | 0.59379  | -0.565065 | Avoid hydr  | Complete        | cluster1 |
| Rajasthan      | 0       | 0.917957 | 0        | 0.520853 | 0.47812  | -0.478121 | Avoid hydr  | Complete        | cluster1 |

|               |         |          |          |          |          |           |               |                     |          |
|---------------|---------|----------|----------|----------|----------|-----------|---------------|---------------------|----------|
| Sikkim        | No data | 0.175309 | No data  | 1.30E-05 | 2.00E-06 | No data   | Avoid<br>hydr | Data-<br>incomplete | cluster2 |
| Tamil Nadu    | 0.4751  | 0.514897 | 0.230489 | 0.5903   | 0.30394  | -0.073455 | Avoid<br>hydr | Complete            | cluster1 |
| Telangana     | 0.4802  | 0.516805 | 0.232018 | 0.825175 | 0.42645  | -0.194436 | Avoid<br>hydr | Complete            | cluster1 |
| Tripura       | 0.3659  | 0.243166 | 0.27695  | 0.585658 | 0.14241  | 0.134538  | Grid<br>hydro | Complete            | cluster0 |
| Uttar Pradesh | 0.0298  | 0.606252 | 0.011715 | 0.932088 | 0.56508  | -0.553365 | Avoid<br>hydr | Complete            | cluster1 |
| Uttarakhand   | 0.0876  | 0.466741 | 0.046716 | 0.042322 | 0.01975  | 0.026963  | Grid<br>hydro | Complete            | cluster2 |
| West Bengal   | 0.1663  | 0.075041 | 0.1538   | 0.954847 | 0.07165  | 0.082148  | Grid<br>hydro | Complete            | cluster2 |
